# Supplementary material
Source: PubMed Central journal article supplement (PMC5065421)
Supplement: 10-1055-s-0042-115017_gf1093de.pdf [file 10-1055-s-0042-115017_gf1093de.pdf]

# Operative Aspekte der Ovargewebsentnahme und Ovargewebstransplantation zur Fertilitätsprotektion

## Surgical Aspects of Ovarian Tissue Removal and Ovarian Tissue Transplantation for Fertility Preservation

### Autoren

M. W. Beckmann, R. Dittrich, S. Findeklee, L. Lotz

### Institut

Frauenklinik, Comprehensive Cancer Center ER-EMN, Universitätsklinikum Erlangen, Friedrich-Alexander-Universität Erlangen-Nürnberg, Erlangen

### Schlüsselwörter

- operative Technik
- Ovargewebe
- Fertilitätsprotektion bei Krebserkrankung
- fertilitätserhaltende Techniken
- Onkofertilität

### Key words

- surgical techniques
- ovarian tissue
- fertility protection in cancer
- fertility preserving techniques
- oncofertility

**eingereicht** 4. 7. 2016

**revidiert** 7. 8. 2016

**akzeptiert** 8. 8. 2016

### Bibliografie

**DOI** <http://dx.doi.org/10.1055/s-0042-115017>  
 Geburtsh Frauenheilk 2016; 76:  
 1–8 © Georg Thieme Verlag KG  
 Stuttgart · New York ·  
 ISSN 0016-5751

### Korrespondenzadresse

**Prof. Matthias W. Beckmann**  
 Frauenklinik  
 Comprehensive Cancer Center  
 ER-EMN  
 Universitätsklinikum Erlangen  
 Friedrich-Alexander-Universität  
 Erlangen-Nürnberg  
 Universitätsstraße 21  
 91054 Erlangen  
 fk-direktion@uk-erlangen.de

### Zusammenfassung

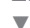

**Einleitung:** Die Entnahme von Ovargewebe vor Beginn einer onkologischen Therapie und seine Transplantation nach Abschluss der Therapie sind operative fertilitätsprotektive Techniken mit stetig zunehmendem Stellenwert. Ziel dieses Reviews ist es, die verschiedenen operativen Techniken bei diesem Verfahren auf Grundlage der bisher veröffentlichten Literatur zu analysieren und ihre Vor- und Nachteile zu diskutieren.

**Review:** Zwischen Januar 2004 und Dezember 2015 publizierte relevante Studien wurden auf MEDLINE nach einem definierten Algorithmus gesucht. Es wurden alle Studiendesigns eingeschlossen, sofern eine Aussage zur operativen Technik getroffen wurde. Wir fanden 16 Publikationen (8 retrospektive Kohortenstudien, 6 Fallberichte und 2 systematische Reviews) mit insgesamt 1898 Patientinnen, in denen auf die operative Technik bei der Ovargewebsentnahme eingegangen wurde, und 15 Veröffentlichungen (7 retrospektive Kohortenstudien, 6 Fallberichte und 2 systematische Reviews) mit 455 Frauen, die sich mit der operativen Technik bei der Ovartransplantation beschäftigten. Es existieren verschiedene operative Techniken sowohl für die Entnahme als auch die Transplantation von Ovargewebe. So existieren verschiedene operative Zugänge sowie Variationen bei der Menge des extrahierten Gewebes, den verwendeten Instrumenten, der Versorgung des Ovars, der Lokalisation und Versorgung des Transplantats und bei der Durchführung simultaner operativer Eingriffe.

**Schlussfolgerungen:** Eine zukünftige Aufgabe wird es sein, für die Ovarentnahme und -transplantation eine standardisierte Operationsmethode zu etablieren, die mit einer niedrigen Komplikationsrate sowie einer hohen Schwangerschafts- und Geburtenrate bei guter Funktionalität des Transplantats einhergeht.

### Abstract

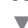

**Introduction:** The removal of ovarian tissue prior to starting oncologic treatment and the subsequent transplantation of this tissue after completing therapy have become increasingly important surgical fertility-preserving techniques. The aim of this review was to investigate the different surgical techniques used for this method reported in the literature to date and to discuss the advantages and disadvantages of the respective techniques.

**Review:** A search was done in MEDLINE using a defined algorithm to find studies published between January 2004 and December 2015. All study designs were included in our review if they contained statements on the surgical technique used. We found 16 publications (8 retrospective cohort studies, 6 case reports and 2 systematic reviews) with a total of 1898 female patients which reported on the surgical technique used for ovarian biopsy and 15 publications (7 retrospective cohort studies, 6 case reports and 2 systematic reviews) with a total of 455 women which mentioned the surgical technique used for ovarian transplantation. Different surgical techniques can be used both for ovarian biopsy and for the transplantation of ovarian tissue. A number of different surgical routes have been used, and the amount of tissue extracted, the instruments used, the treatment of the ovary, the transplantation site, the blood supply to the transplanted ovarian tissue and the procedure used for simultaneous surgical interventions vary.

**Conclusion:** In future, one of the tasks will be to establish a standard surgical method for ovarian extraction and transplantation which will have a low rate of complications and a high pregnancy and birth rate while ensuring that the transplanted tissue is fully functional.

## Einleitung

Die Erfolge der Onkologie in den letzten Jahren und Jahrzehnten haben zu neuen Herausforderungen für die Medizin geführt. Auf der einen Seite wurde durch die verfügbaren systemischen Therapien das Langzeitüberleben insbesondere bei hämatologischen Neoplasien deutlich gesteigert. So ließ sich die 10-Jahres-Überlebensrate von Patientinnen mit Leukämien und Lymphomen auf 90% steigern. Andererseits geht die antikarzinogene Wirkung der Systemtherapien zulasten der ovariellen Reserve. Bis heute wurden keine Ansätze gefunden, das gonadotoxische Potenzial von Chemotherapeutika zu reduzieren [1,2]. Nichtsdestotrotz habe viele junge an Krebs erkrankte Frauen noch einen zukünftigen Kinderwunsch. Befragungen von an Krebs erkrankten Frauen zeigen, dass bis zu jede 7. Erkrankte sogar bereit wäre, Einbußen beim langfristigen onkologischen Outcome in Kauf zu nehmen, wenn damit ihr späterer Kinderwunsch erfüllt werden könnte [3]. Um diesem Umstand Rechnung zu tragen haben sich insbesondere im Laufe der letzten Dekade verschiedene Methoden der Fertilitätsprotektion etabliert.

Die klassischste und älteste Methode ist dabei die Gonadensuppression mit einem GnRH-Analagon beginnend 1–2 Wochen vor dem Start der Chemotherapie bis 2 Wochen nach Abschluss der Chemotherapie. Diese fertilitätsprotektive Maßnahme alleine wird jedoch von der amerikanischen Fachgesellschaft als unzureichend eingeschätzt [4]. Es existieren zwar auch Studien, die einen möglichen Benefit durch die Therapie mit GnRH-Analoga zeigen. Dazu gehört der jüngst abgeschlossene Option-Trial [5]. Allerdings sind die hier untersuchten Patientinnengruppen klein, sodass bis heute keine ausreichenden Daten existieren, um eine generelle Anwendung dieser Medikamentengruppe zur Fertilitätsprotektion zu empfehlen. Anders als die übrigen fertilitätsprotektiven Methoden ist die GnRH-Gabe kein Standard. Als besonders umstritten gilt die medikamentöse Gonadensuppression beim Hormonrezeptor-positiven Mammakarzinom, weil man befürchtet, dass der Tumor anschließend weniger sensitiv für eine adjuvante endokrine Therapie ist. Kommt neben einer Chemotherapie noch zusätzlich oder alleine eine Radiotherapie des Beckens zum Einsatz, besteht die Option, die Ovarien vorher aus dem Bestrahlungsfeld zu verlagern oder zu bedecken, was laut Literatur mit einer bis zu 70%igen Chance des Erhalts der Ovarfunktion einhergeht [6]. In den 90er-Jahren entwickelte sich die Technik der hormonellen Stimulation des Ovars, anschließend die Follikelpunktion und später die Kryokonservierung der unfertilisierten oder fertilisierten Oozyten. Diese kann prinzipiell in allen Phasen des Zyklus angeboten werden [7]. Ihr Vorteil ist das Umgehen eines operativen abdominalen Eingriffs. Limitationen dieses fertilitätsprotektiven Verfahrens sind der Zeitverlust bis zum Beginn der onkologischen Therapie und Vorbehalte bei hormonabhängigen Tumoren. Daher kann diese Methode bei hochproliferativen Malignomen wie hämatologischen Neoplasien meist nicht zum Einsatz kommen. Bis heute existieren keine Hinweise dafür, dass eine Stimulation mit Gonadotropinen zur Gewinnung von Eizellen zu einer Verschlechterung der Prognose beim Hormonrezeptor-positiven Mammakarzinom führt. Dennoch äußern zahlreiche Patientinnen diesbezüglich Ängste und entscheiden sich gegen diese Methode der Fertilitätsprotektion. Das jüngste und innovativste Verfahren zur Fertilitätsprotektion bei Krebs stellt die Kryokonservierung eines Teils des Ovars vor der onkologischen Therapie und die spätere Transplantation nach Abschluss der Therapie dar. Die Ovarkryokonservierung zur Fertilitätsprotektion bei Krebs hat sich im Laufe der letzten Dekade

technisch rasant weiterentwickelt. Somit wird sie heute als Standardverfahren des Fertilitätserhalts betrachtet und hat durch die zunehmenden Erfolge ihren früheren experimentellen Charakter verloren. Welches Verfahren der Fertilitätsprotektion in der jeweiligen Situation angewendet werden sollte, hängt von der Art, Dauer und Intensität der onkologischen Therapie ab [8]. Auch eine Kombination mehrerer oder sogar aller Verfahren zur Fertilitätsprotektion ist möglich. Vieles spricht für die Methode der Ovarkryokonservierung, Lagerung des Gewebes in einer Ovarkryobank und seine spätere Transplantation. Das wichtigste Argument für diese fertilitätsprotektive Maßnahme ist sicher der fehlende Zeitverlust zwischen der die Fertilität erhaltenden Maßnahme und dem Beginn der Krebstherapie. Zudem ist es die einzige fertilitätsprotektive Option für an Krebs erkrankte präpubertäre Mädchen und die einzige Methode, mit der die Fertilität der Patientinnen nach Verlust wiederhergestellt werden kann und sogar eine natürliche Konzeption ermöglicht wird. Nachdem Donnez et al. 2004 von der ersten Schwangerschaft nach der Transplantation von vor der Krebstherapie entnommenem Eierstockgewebe berichteten, wurden bislang weltweit rund 75 Kinder dank dieses Verfahrens geboren [9]. Allerdings handelt es sich hierbei um ein operatives Vorgehen. Trotz seiner inzwischen weitverbreiteten Anwendung existieren bis heute, abgesehen von Fallserien einzelner Zentren, keine zusammenfassenden Übersichtsarbeiten, die sich mit den anzuwendenden operativen Techniken und ihren Vor- und Nachteilen beschäftigen. Anliegen dieses Reviews ist es, die bisher veröffentlichten Publikationen der die Ovargewebsentnahme und spätere -transplantation durchführenden Zentren hinsichtlich der verschiedenen möglichen operativen Techniken zu analysieren sowie die Vor- und Nachteile der einzelnen Techniken zu diskutieren.

## Review

Es handelt sich um einen systematischen Review der publizierten Literatur zu operativen Techniken der Entnahme und Transplantation von Ovargewebe mit dem Ziel der Fertilitätsprotektion bei Krebs. Relevante Publikationen wurden für den Zeitraum Januar 2004 bis Dezember 2015 auf MEDLINE gesucht. Die Suchbegriffe waren „removal of ovarian tissue“, „extraction of ovarian tissue“, „surgical techniques“, „complications“, „transplantation of ovarian tissue“, „fertility preservation“ und „ovarian surgery“. Die Suche beschränkte sich auf Entnahmen und Transplantationen von Ovargewebe beim Menschen. Es gab bei der Literatursuche keine Beschränkungen hinsichtlich der Sprache. In den Review eingeschlossen wurden Publikationen in englischer, französischer und deutscher Sprache. Auch die Referenzen der ausgewählten Veröffentlichungen wurden berücksichtigt, um ggf. noch zusätzliche Artikel zu finden. Die Titel und Abstracts potenziell relevanter Artikel wurden gelesen, um herauszufinden, ob sie den gewünschten Kriterien entsprechen. Die Daten der relevanten Artikel wurden in ein Datenformular übertragen, das zuvor von unserer Review-Gruppe entwickelt und getestet wurde. Bei den operativen Techniken wurden folgende Kriterien analysiert:

### bei der Entnahme von Ovargewebe:

- ▶ operativer Zugang bei der Entnahme von Ovargewebe
- ▶ Menge des entnommenen Ovargewebes
- ▶ verwendete Instrumente bei der Entnahme
- ▶ Behandlung der Ovaroberfläche nach der Entnahme

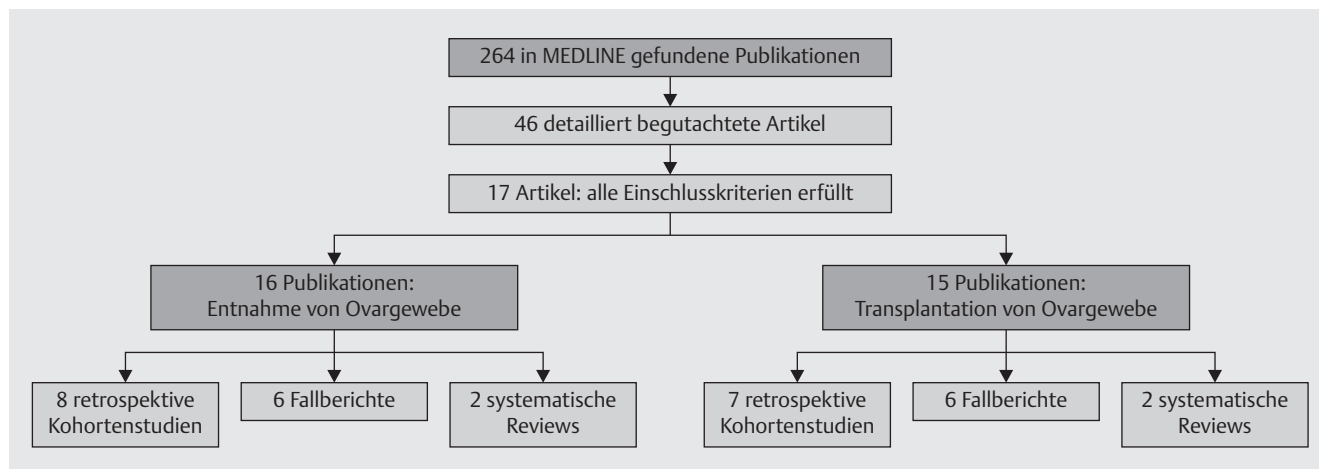

Abb. 1 Flussdiagramm des Literatursuche-Prozesses.

- ▶ Durchführung simultaner operativer Eingriffe bei der Entnahme

#### bei der Transplantation von Ovargewebe:

- ▶ operativer Zugang bei der Ovargewebstransplantation
- ▶ Lokalisation des Transplantats
- ▶ verwendete Instrumente bei der Ovargewebstransplantation
- ▶ operative Versorgung der Transplantationsstelle
- ▶ Durchführung simultaner operativer Eingriffe bei der Transplantation

Die MEDLINE-Suche ergab 264 Publikationen nach Anwendung des unter Material und Methoden genannten Suchalgorithmus. Nach einem Screening der Überschriften und Abstracts wurden die Volltexte von insgesamt 46 Artikeln detailliert begutachtet. 17 Artikel erfüllten alle 3 Einschlusskriterien (Beschreibung der operativen Technik der Ovargewebsentnahme und/oder -transplantation zur Fertilitätsprotektion bei an Krebs erkrankten Frauen zwischen 2004 und 2015).

16 Publikationen beschäftigten sich mit der Entnahme von Ovargewebe. Davon waren 8 retrospektive Kohortenstudien, 6 Fallberichte und 2 systematische Reviews. Drei der Publikationen beschäftigten sich ausschließlich mit der Ovargewebsentnahme unabhängig von einer evtl. späteren Transplantation.

Alles in allem 15 Veröffentlichungen beschäftigten sich mit der operativen Technik bei der Ovargewebstransplantation (7 retrospektive Kohortenstudien, 6 Fallberichte und 2 systematische Reviews). Ein Artikel handelte ausschließlich von der Transplantation des Ovargewebes, ohne auf die frühere Gewebsentnahme einzugehen [10–26]. **Abb. 1** veranschaulicht den Literatursuche-Prozess.

Die verfügbaren Daten beziehen sich auf die Entnahme von Ovargewebe bei insgesamt 1898 Frauen. Dabei waren die häufigsten Indikationen für eine Anwendung dieser fertilitätserhaltenden Technik das Mammakarzinom ( $n = 832$ , 43,8%), gefolgt von hämatologischen Neoplasien ( $n = 785$ , 41,4%). Bei 16 Patientinnen (0,8%) fand sich keine Angabe über die vorliegende Diagnose. Das mittlere Alter zum Zeitpunkt der Ovariantnahme betrug 26,5 Jahre (Range 0,5–39,8 Jahre). In 2 Studien wurde keine Aussage über das Patientinnenalter gemacht. Daten zur Transplantation des Ovargewebes lagen für 455 Frauen vor. Die häufigsten Diagnosen waren wie auch in der Gruppe der Patientinnen, denen Ovargewebe entnommen wurde, Brustkrebs ( $n = 169$ , 37,1%) und maligne hämatologische Erkrankungen ( $n = 147$ , 32,3%). Drei

Publikationen mit insgesamt 23 Patientinnen (5,1%) enthielten keine Information über die Diagnose. **Abb. 2** zeigt eine grafische Darstellung der onkologischen Diagnosen der Frauen, deren Ovargewebe kryokonserviert wurde. Das durchschnittliche Alter zum Zeitpunkt der Ovargewebsentnahme betrug 27 Jahre. Die Länge des Intervalls zwischen der Entnahme und Transplantation betrug 2–8 Jahre. Vier Publikationen gaben das Alter zum Transplantationszeitpunkt nicht an.

#### Operative Techniken

##### Operativer Zugang bei der Entnahme von Ovargewebe

Die meisten Autorinnen und Autoren bevorzugten bei der Entnahme von Ovargewebe den laparoskopischen Zugang. Lediglich Rosendahl et al. und Silber et al. berichten, dass sie sich bei Kindern für eine Minilaparotomie entschieden. Diese wurde durch eine erfahrene Kinderchirurgin bzw. Kinderchirurg durchgeführt [22, 23].

##### Menge des entnommenen Ovargewebes

Die meisten Zentren entschieden sich für die Entnahme von  $\frac{1}{3}$  des Ovars (254 Frauen) oder  $\frac{2}{3}$  eines Eierstocks (446 Frauen). Schmidt et al., Demeestere et al. und Revel et al. entnahmen ein komplettes Ovar bei insgesamt 104 Frauen [16, 18, 19]. Die Arbeitsgruppen um Donnez und Silber et al. entnahmen dagegen nur Ovarbiopsien  $< 2$  mm im maximalen Durchmesser bei insgesamt 77 Frauen. In den übrigen Publikationen (1017 Frauen) fanden sich keine Angaben zur Menge des entnommenen Gewebes. Donnez et al. berichten in ihrem Review von 60 durchgeführten Ovariantnahmen und -transplantationen an 3 verschiedenen Zentren, dass die Biopsie des Ovars mindestens 1–1,5 mm in die Tiefe gehen sollte, weil die Primordialfollikel in einem Abstand von ca. 0,8 mm zur Ovaroberfläche liegen [11]. Bei oberflächlichen und dünnen Biopsien besteht dagegen die Gefahr, keine Primordialfollikel zu erfassen, wodurch keine Fertilitätsreserve angelegt werden kann. Dieses Risiko lässt sich durch die Entnahme eines Keils des Ovars verhindern. Anders als früher angenommen, reicht es aber aus, nur einen Teil des Eierstocks zu asservieren. Einen Keil des entnommenen Ovars zeigt **Abb. 3**.

##### Verwendete Instrumente bei der Entnahme

Als Standardverfahren bei der Entnahme von Ovargewebe zur Fertilitätsprotektion kristallisiert sich die Extraktion des Gewe-

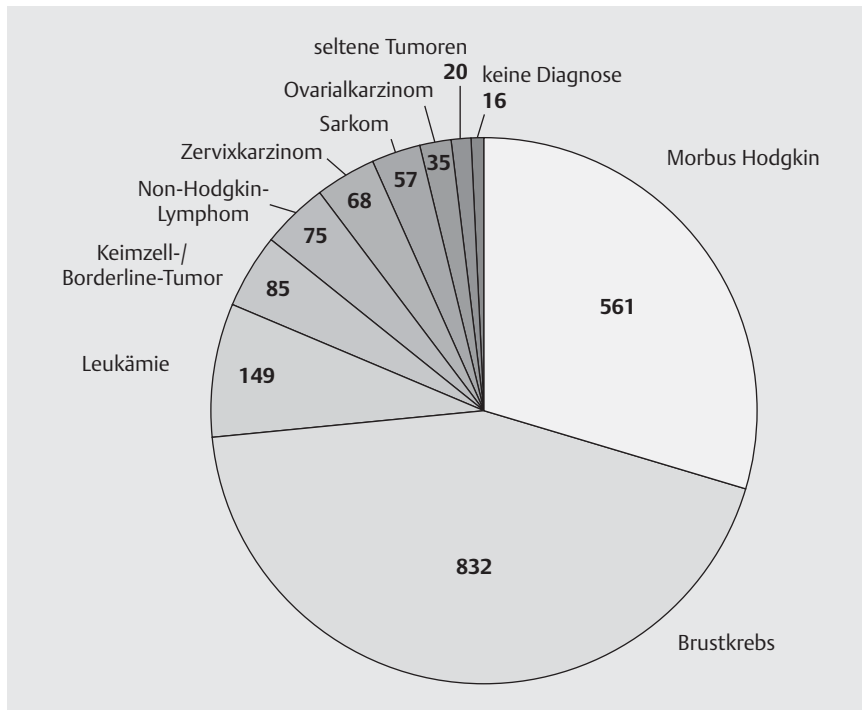

**Abb. 2** Tumorentitäten bei den Frauen, deren Ovargewebe kryokonserviert wurde (seltene Tumoren: Mesotheliom: 11; Vulvakarzinom: 3; Paranasalsinuskarzinom: 3; Analkarzinom: 1; Rektumkarzinom: 1; Magenkarzinom: 1).

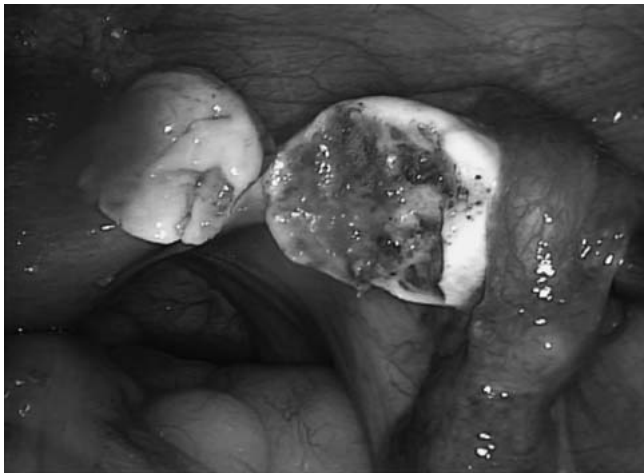

**Abb. 3** Laparoskopische Ovargewebsentnahme: links Keil des entnommenen Ovars ohne Koagulation, rechts verbleibendes Restovar, dessen Oberfläche zur Blutstillung bipolar koagulierte wurde.

bes mithilfe von Schere bzw. Skalpell ohne Koagulation heraus. Über die Anwendung dieser operativen Technik berichten Dittrich et al., Huober-Zeeb et al. und Lawrenz et al. auf der Grundlage von wegen des Wunsches nach Fertilitätsprotektion bei 560 Frauen durchgeführten Operationen [10, 12, 21]. Silber et al. berichten über den Einsatz einer mikrobipolaren Biopsiezange, um eine effiziente Blutstillung zu gewährleisten [23]. Andere Arbeitsgruppen bevorzugen den Einsatz von Instrumenten ohne Koagulation, um das operative Trauma für das empfindliche Ovargewebe zu minimieren [12, 21]. So weisen Rosendahl et al. daraufhin, dass es durch den Einsatz von Strom intraoperativ zu einem Verlust von Primordialfollikeln kommen kann. Sie empfehlen daher, erst mit einer bipolaren Koagulation der Ovaroberfläche zu beginnen, wenn das Ovargewebsfragment entnommen

wurde und die Koagulation im Sinne eines Schutzes des Restovars so sparsam wie möglich einzusetzen [22].

#### Behandlung der Ovaroberfläche nach der Entnahme

Rosendahl et al. empfehlen auf Grundlage von 386 an ihrem Zentrum durchgeführten Ovargewebsentnahmen eine bipolare Koagulation der Ovaroberfläche nach der Entnahme des später zu transplantierenden Gewebsfragments, falls eine Blutung von der Ovaroberfläche auftritt [22]. Silber et al. wenden primär bipolare Instrumente an, wohingegen Dittrich et al. bei den ersten 20 Ovargewebsentnahmen und -transplantationen an ihrem Zentrum nur bei Bedarf punktuell mittels bipolarem Strom koaguliert haben [10, 23]. Silber et al. schlugen den Einsatz von Gewebekleber oder einer heparinhaltigen Kochsalzlösung zur Versorgung der Ovaroberfläche nach der Gewebsextraktion vor, wohingegen am Zentrum Dittrichs et al. keine Versorgung oder Behandlung der Oberfläche des entnommenen Ovargewebsfragments erfolgte [10, 23]. Die anderen Arbeitsgruppen äußerten sich nicht zur Versorgung der Ovaroberfläche.

#### Simultane operative Eingriffe bei der Entnahme

Denkbare simultane Operationen während der Entnahme von Ovargewebe zur Fertilitätsprotektion sind z.B. die Entfernung eines Myoms oder von Adhäsionen sowie die Durchführung einer Chromopertubation. Dittrich et al. nahmen bei einer Patientin eine Myomenukleation vor, während Revelli et al. in ihrem Fallbericht von einer Chromopertubation mit Methylenblau berichteten [10, 20]. Mehr Angaben hierzu fanden sich in der Literatur nicht.

Eine Übersicht über die publizierten operativen Techniken bei der Ovargewebsentnahme bietet **Tab. 1**.

#### Operativer Zugang bei der Transplantation von Ovargewebe

Auch bei der Transplantation des Ovargewebes entschieden sich die meisten Autorinnen und Autoren für einen laparoskopischen



Zugang. Bei insgesamt 329 Frauen erfolgte eine Bauchspiegelung, bei 2 Frauen eine Laparotomie und bei 2 Mädchen eine Kombination aus Laparoskopie und Laparotomie.

### Lokalisation des Transplantats

Die verbreitetsten Transplantationstechniken bei der Rückgabe des Ovargewebes nach Abschluss der onkologischen Therapie sind die Transplantation in eine Bauchfelltasche der Beckenwand in der Nähe des Ovars und eine Transplantation auf das ipsi- und/oder kontralaterale Ovar. 13 Arbeitsgruppen, die Ovartransplantationen bei insgesamt 345 Patientinnen durchführten, berichten über die Technik der Transplantation in eine peritoneale Tasche. An insgesamt 12 Zentren, die Transplantationen bei zusammen 351 Frauen nach Krebserkrankung durchführten, erfolgte die Transplantation auf das Ovar, wobei Imbert et al., Donnez et al. und Dittrich et al. berichten, dass an ihrem Zentrum sowohl in die Beckenwand als auch auf das Ovar transplantiert wurde. So erhielten am Zentrum Dittrichs et al. 16 Frauen Ovargewebe nur in die Beckenwand transplantiert und 4 Frauen sowohl in die Beckenwand als auch auf das Ovar. Imbert et al. und Donnez et al. schlüsselten die Zahlen nicht näher auf [10, 11, 26]. Als Argumente für eine Transplantation auf das ipsi- und/oder kontralaterale Ovar werden die physiologische anatomische Lokalisation und die damit gute Durchblutung und Auffindbarkeit des Transplantats genannt [11]. Dolmans et al. dagegen schreiben in ihrer Publikation, dass auch nach der Transplantation in die Beckenwand ein Einsprossen von Gefäßen in das Transplantat beobachtet werden kann [24]. Bei der Transplantation in eine peritoneale Tasche gibt es die Möglichkeit einer simultanen Transplantation direkt nach der Präparation des Peritoneums oder einer sekundären Transplantation im Rahmen eines 2. operativen Eingriffs. Zehn Zentren führten die simultane Transplantation durch. Vier Zentren bevorzugten eine sekundäre Transplantation im Verlauf, wobei in der Arbeitsgruppe Imberts et al. sowohl primär als auch sekundär in das Peritoneum transplantiert wurde. Gerade die ersten Ovartransplantationen erfolgten im Rahmen eines sekundären operativen Eingriffs, wovon man sich eine bessere spätere Durchblutung des Transplantats versprochen hat [17]. Eine weitere Transplantationstechnik, die an 4 Zentren – jedoch an 2 Zentren nicht ausschließlich – angewendet wurde, ist die heterotope Transplantation in das subkutane Fettgewebe außerhalb des Be-

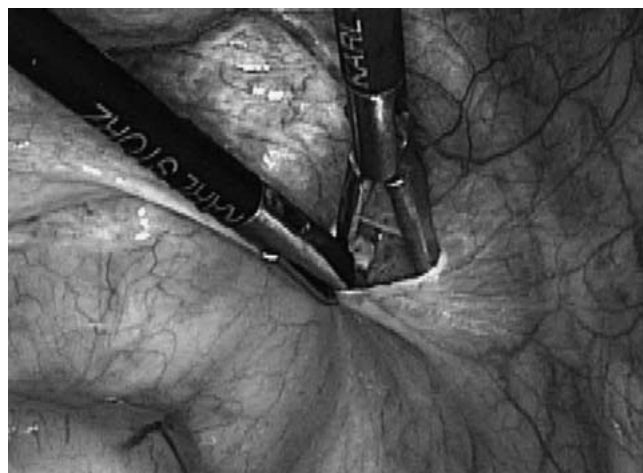

**Abb. 4** Transplantatstelle für das aufgetaute Ovargewebe in der rechten Beckenwand.

ckens [16, 18, 22, 26]. **Abb. 4** zeigt die Transplantatstelle im Bereich der rechten Beckenwand.

### Verwendete Instrumente bei der Transplantation

Am Zentrum Dittrichs et al. wurde bei 20 Patientinnen zur Präparation der Transplantationsstelle an Beckenwand oder Ovar Schere ohne Koagulation verwendet [10]. Silber et al. verwendeten bei 16 Frauen eine bipolare Biopsiezange [23]. Während die 1. Arbeitsgruppe vor allem auf den Schutz des Ovargewebes bedacht war, stand für die 2. die Prävention einer Blutung im Vordergrund. Die anderen Zentren machten keine Angabe zu den verwendeten Instrumenten.

### Operative Versorgung der Transplantationsstelle

Hier muss grundsätzlich zwischen einer Transplantation auf das Ovar oder in das Peritoneum unterschieden werden. Im Rahmen der Ovartransplantation sprechen sich Silber et al. für eine Präparation des ipsilateralen Ovars bis zur Medulla aus. Es werden dann 0,8–1 mm dünne Streifen des Ovartransplantats auf der Medulla des ipsilateralen Ovars mit 9–0-Nylonfäden mittels Ein-

**Tab. 1** Literaturtabelle zu operativen Techniken bei der Ovargewebsentnahme.

| untersuchtes operatives Kriterium               | mögliche Optionen                                  | Publikationen |
|-------------------------------------------------|----------------------------------------------------|---------------|
| operativer Zugang bei der Ovargewebsentnahme    | Laparotomie                                        | [21, 22]      |
|                                                 | Laparoskopie                                       | [9–20]        |
|                                                 | Laparoskopie + Laparotomie                         | keine Daten   |
| Menge des entnommenen Ovargewebes               | $\frac{3}{3}$ eines Ovars                          | [15, 17, 18]  |
|                                                 | $\leq \frac{2}{3}$ eines Ovars                     | [9, 11, 21]   |
|                                                 | $\leq \frac{1}{3}$ eines Ovars                     | [12–14, 19]   |
|                                                 | Ovarbiopsien < 2 mm                                | [10, 16, 22]  |
| verwendete Instrumente bei der Entnahme         | Schere bzw. Skalpell ohne Koagulation              | [9, 11, 20]   |
|                                                 | Schere bzw. Skalpell mit Koagulation               | keine Daten   |
|                                                 | Biopsiezange                                       | [22]          |
| Behandlung der Ovaroberfläche nach der Entnahme | Blutstillung durch Koagulation                     | [21, 22]      |
|                                                 | keine Koagulation                                  | keine Daten   |
|                                                 | Rekonstruktion des Ovars durch adaptierende Nähte  | keine Daten   |
|                                                 | keine Organrekonstruktion                          | [9]           |
|                                                 | Auftragen von Gewebekleber auf die Exzisionsfläche | [22]          |
| simultane operative Eingriffe bei der Entnahme  | Myomenukleation                                    | [9]           |
|                                                 | Chromopertubation                                  | [20]          |

**Tab. 2** Literaturtabelle zu operativen Techniken bei der Ovargewebstransplantation.

| untersuchtes operatives Kriterium                     | mögliche Optionen                                                  | Publikationen                      |
|-------------------------------------------------------|--------------------------------------------------------------------|------------------------------------|
| operativer Zugang bei der Ovargewebstransplantation   | Laparotomie                                                        | [12, 24]                           |
|                                                       | Laparoskopie                                                       | [9, 10, 13, 16, 17, 19, 22, 25]    |
|                                                       | Laparoskopie + Laparotomie                                         | [18, 21]                           |
| Lokalisation des Transplantats                        | peritoneale Tasche im Bereich der Beckenwand in der Nähe des Ovars | [9, 10, 12, 13, 15–18, 21, 22, 25] |
|                                                       | ipsilaterales Ovar                                                 | [9, 15, 18]                        |
|                                                       | kontralaterales Ovar                                               | [12, 13]                           |
|                                                       | ipsilaterales oder kontralaterales Ovar                            | [10, 17, 21, 22, 25]               |
|                                                       | ipsilaterales und kontralaterales Ovar gleichzeitig                | [19, 24]                           |
|                                                       | heterotope Transplantation in das abdominale subkutane Fettgewebe  | [15, 17, 21, 25]                   |
| verwendete Instrumente bei der Transplantation        | Schere bzw. Skalpell ohne Koagulation                              | [9]                                |
|                                                       | Biopsiezange                                                       | [22]                               |
| operative Versorgung der Transplantationsstelle       | kein Verschluss des Peritoneums nach der Transplantation           | [9]                                |
|                                                       | Verschluss des Peritoneums nach der Transplantation mittels Naht   | [10, 12, 18, 19, 22]               |
|                                                       | Verschluss des Peritoneums mit Gewebekleber                        | [10, 12]                           |
|                                                       | Fixation des Transplantats mit Gewebekleber                        | [10, 12]                           |
|                                                       | keine Koagulation des Peritoneums                                  | [9]                                |
| simultane operative Eingriffe bei der Transplantation | Koagulation des Peritoneums                                        | keine Daten                        |
|                                                       | Chromopertubation                                                  | [9]                                |
|                                                       | Anlage einer Drainage                                              | [9]                                |

zellknopfnah festgenäht. Dadurch kommt es nach Ansicht der Autoren zur Verhinderung eines Hämatoms unterhalb des Transplantats [23]. Donnez et al. beschreiben im Review über ihre ersten 60 Ovartransplantationen bei einer Transplantation auf das Ovar zunächst eine Präparation der Ovarrinde (sogenannte Dekortikation) und ein anschließendes mikrochirurgisches Festnähen des Ovarrinden-Transplantats mit 6–0- oder 7–0-Propylen-Fäden oder alternativ ein Festkleben des Transplantats auf dem Ovar-Mark mit Interceed- oder Fibrinkleber. Sollte kein funktionelles Ovargewebe mehr vorhanden sein, schlagen Donnez et al. die Inzision des Peritoneums am vorderen Blatt des Lig. latum im Bereich eines sichtbaren Gefäßnetzes, das Einbringen des Transplantats in das peritoneale Fenster, eine Fixierung mit Interceed sowie eine Befestigung der Ecken mit Fibrinkleber vor [11]. Auch Sanchez-Serrano et al. befestigten das peritoneale Transplantat in ihrem Fallbericht mit Gewebekleber und verschlossen anschließend damit auch das Peritoneum [13]. Dagegen verzichtete die Arbeitsgruppe um Dittrich et al. sowohl auf eine Fixierung des Transplantats mit Fremdmaterial als auch auf einen Verschluss des Peritoneums und eine Koagulation. Drei andere Zentren, welche die Ovartransplantation bei 18 Patientinnen durchführten, plädierten für einen Verschluss des Peritoneums mit Nähten [19, 20, 23].

#### Simultane operative Eingriffe bei der Transplantation

Hier gibt es wenig Daten. Lediglich das Zentrum Dittrichs et al. beschreibt die Durchführung einer Chromopertubation im Rahmen der Ovartransplantation. Zudem wurde regelhaft eine Drainage angelegt [10].

Eine Übersicht über die publizierten operativen Techniken bei der Ovargewebstransplantation bietet **Tab. 2**.

#### Schlussfolgerungen

Die Entnahme von Ovargewebe vor der onkologischen Therapie und seine spätere Transplantation nach Abschluss der Krebstherapie ist zweifelsfrei ein innovatives Verfahren der Fertilitätschirurgie mit wachsender Bedeutung. Mittlerweile bietet eine

Vielzahl von Zentren dieses Verfahren seinen Patientinnen an. Ein Blick in die Literatur zeigt, dass die Zahl der Schwangerschaften und Geburten nach der Transplantation von kryokonserviertem Ovargewebe in den letzten Jahren kontinuierlich gestiegen ist und damit als etabliert angesehen werden muss. Trotzdem existieren wenig Daten zur geeigneten operativen Technik bei dieser fertilitätsprotektiven Methode. Um diese Wissenslücke zumindest teilweise zu schließen, entstand der folgende Review. Die Analyse von 17 Publikationen zur Entnahme bzw. Transplantation von Ovargewebe zeigt, dass es verschiedene operative Verfahren gibt, die in Abhängigkeit vom jeweiligen Zentrum angewendet werden. Eine große Übereinstimmung besteht beim operativen Zugangsweg. So bevorzugen alle Ovargewebe entnehmenden und transplantierenden Zentren den laparoskopischen Zugang. Lediglich bei Kindern wird auch eine Minilaparotomie in Zusammenarbeit mit der Kinderchirurgie diskutiert. Der laparoskopische Zugang erscheint insofern sinnvoll, als dass die Ovarkryokonservierung häufig dann gewählt wird, wenn wenig Zeit bis zum Beginn der Chemotherapie zur Verfügung steht. Dann erweist es sich als günstig, wenn die Patientinnen infolge der minimalinvasiven Operation schnell mobil sind und ggf. am Tag der Operation wieder entlassen werden können, um ohne Zeitverzug mit der Chemotherapie zu beginnen. Die Laparoskopie ist integraler Bestandteil der operativen Gynäkologie und durch eine niedrige Komplikationsrate gekennzeichnet [27].

Weiter gehen die Ansichten bei der Menge des zu entnehmenden Ovargewebes auseinander. Donnez et al. weisen darauf hin, dass Ovarbiopsien eine Tiefe von mindestens 1 mm haben sollten, da sonst die unterhalb der Ovarrinde liegenden Primordialfollikel nicht erreicht werden [10]. Andere Zentren entnehmen einen Keil von  $\frac{1}{3}$  bis  $\frac{2}{3}$  eines Ovars [10, 12–15, 20, 22], manche sogar ein komplettes Ovar [16, 18, 19]. Dies erscheint insofern vertretbar, da bei Verlust eines Ovars der andere Eierstock die Follikelrekrutierung und Hormonproduktion aufrechterhalten kann [28]. Die Entnahme eines größeren Gewebsfragments eröffnet die Perspektive einer mehrmaligen Transplantation verschiedener Portionen, womit die reproduktive und endokrine Funktion des Eierstocks über einen längeren Zeitraum aufrechterhalten werden kann. Ein Kompromiss aus den verschiedenen Herangehenswei-

sen der Zentren könnte sein, vor einer geplanten aggressiven Chemotherapie (z.B. Hochdosis-Chemotherapie und Ganzkörperbestrahlung vor Knochenmarktransplantation, Chemotherapie mit Alkylanzien) einen größeren Teil des Ovars zu entfernen und bei weniger toxischen Protokollen mehr Ovargewebe in situ zu belassen.

Bei den verwendeten Instrumenten sowohl bei der Gewebentnahme als auch bei der Transplantation bevorzugen die meisten Zentren Schere bzw. Skalpell ohne Koagulation. Silber et al. dagegen berichten über den Einsatz einer bipolaren Biopsiezange zur Blutstillung [23]. Rosendahl et al. weisen darauf hin, dass es durch Koagulation zu einer Schädigung des Ovargewebes und damit zu einer Abnahme der ovariellen Reserve durch eine Verringerung der Zahl der Primordialfollikel kommen kann [22]. Insofern sollte Strom intraoperativ vorsichtig und möglichst nicht im Bereich des zu entnehmenden Fragments eingesetzt werden. Bei der Behandlung der Ovaroberfläche gehen die Meinungen zwischen den Zentren ebenfalls auseinander. So werden sowohl die bipolare Koagulation als auch die Versorgung mittels Nähten und Gewebekleber oder der Verzicht auf eine Koagulation vorgeschlagen. Hier gilt es wohl, den Schutz des Ovargewebes mit dem möglichen Risiko einer Nachblutung abzuwägen.

Für die Lokalisation des Transplantats gibt es 3 denkbare Möglichkeiten. Dies sind eine Transplantation auf das Ovar ipsilateral und/oder kontralateral, in eine Peritonealtasche ipsilateral und/oder kontralateral und eine heterologe Transplantation. Für das Ovar als Transplantationsort könnte sprechen, dass das Gewebe auch von der Stelle stammt und das Transplantat im Verlauf leicht wiederauffindbar und ggf. entfernbar ist. Dafür ist das Risiko für Blutungen höher und es besteht die Möglichkeit einer Traumatisierung des Ovars, was bei der Transplantation in eine Bauchfelltasche entfällt. Vorteil der heterotopen Transplantation ist, dass keine Bauchoperation notwendig wird. Andererseits sind alle publizierten Geburten nach einer orthotopen Transplantation erfolgt [11]. Zudem bedarf es bei der heterotopen Transplantation der Entnahme der Eizelle aus dem Transplantat und der In-vitro-Fertilisation, während es bei der orthotopen Transplantation auch zu spontanen Schwangerschaften kommen kann. Kontroversen ergeben sich wieder bei der operativen Versorgung der Transplantationsstelle. Während die meisten Zentren sowohl bei der Transplantation auf den Eierstock als auch in das Bauchfell das Transplantat mit Nähten oder Gewebekleber fixieren, schlägt ein Zentrum [10] vor, keinerlei Eingriffe am transplantierten Gewebe vorzunehmen [10, 11, 13]. Erfolgt die Transplantation in das Peritoneum, bestehen die Optionen, das Bauchfell mithilfe einer Naht zu verschließen oder eine spontane Adaptation anzustreben. Vorteil der Naht ist dabei der sichere Verschluss der formierten Tasche, sodass das transplantierte Gewebe nicht herausfallen kann. Einen Nachteil eines Verschlusses mit Nähten oder anderen Materialien stellt die zusätzliche Gewebstraumatisierung mit einem womöglich höheren Risiko für Adhäsionen und postoperative Schmerzen dar. Nicht zuletzt kann es durch eingebrachtes Fremdmaterial wie Naht oder Kleber zur Aktivierung einer Fremdkörperreaktion mit ggf. einer Abstoßung des transplantierten Gewebes kommen. Im Übrigen wird auch bei der Sectio caesarea nach Misgav Ladach auf einen Peritonealverschluss verzichtet.

Ein letzter Punkt, der untersucht wurde, war die Durchführung simultaner operativer Eingriffe bei der Entnahme und Transplantation von Ovargewebe. Dies wurde nur von 2 Arbeitsgruppen berichtet [10, 20]. Gerade bei der Rückgabe des Eierstockgewebes macht die Entfernung eines Myoms oder anderer die Fertilität

potenziell mindernder Faktoren sowie eine Überprüfung der Eileiterdurchgängigkeit Sinn. So finden sich in der Literatur Berichte über Spontankonzeptionen nach der Ovargewebstransplantation [20]. Es ist allerdings auch möglich, dass Chromopertubationen an den anderen Zentren durchgeführt wurden, dies in den Publikationen jedoch nicht erwähnt wurde. Hier wird eine Limitation des vorliegenden Literaturreviews deutlich. Die Datenlage ist sehr begrenzt. In vielen Publikationen wird die angewendete operative Technik nur in groben Zügen beschrieben. Manchmal ist auch von der „standard procedure“ die Rede, obwohl es keine Beschreibung einer „standard procedure“ gibt.

Zusammenfassend zeigt der Review der Literatur zu operativen Techniken bei der Ovargewebentnahme und -transplantation, dass verschiedene operative Techniken zur Durchführung dieser fertilitätsprotektiven Methode existieren. Bis heute ist bei kleiner Fallzahl der transplantierenden Zentren und vielen Variationen der Technik unklar, welche operative Technik die beste ist. Eine zukünftige Aufgabe stellt die Entwicklung einer normierten Operationstechnik mit standardisierter Durchführbarkeit und guter Funktionalität in Form einer guten Transplantatfunktion und einer hohen Schwangerschafts- und Geburtenrate dar.

### Interessenkonflikt

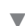

Die Autoren erklären keinen Interessenkonflikt.

### Literatur

- 1 Mattle V, Behringer K, Engert A et al. Female fertility after cytotoxic therapy—protection of ovarian function during chemotherapy of malignant and non-malignant diseases. *Eur J Haematol Suppl* 2005; 66: 77–82
- 2 Anderson RA, Wallace WH, Baird DT. Ovarian cryopreservation for fertility preservation: indications and outcomes. *Reproduction* 2008; 136: 681–689
- 3 Lee MC, Gray J, Han HS et al. Fertility and reproductive considerations in premenopausal patients with breast cancer. *Cancer Control* 2010; 17: 162–172
- 4 Ethics Committee of American Society for Reproductive Medicine. Fertility preservation and reproduction in patients facing gonadotoxic therapies: a committee opinion. *Fertil Steril* 2013; 100: 1224–1231
- 5 Anderson R, Adamson D, Yellowlees A et al. GnRH agonist for protection against ovarian toxicity during chemotherapy for early breast cancer: the OPTION trial. *Anglo Celtic Collaborative Oncology Group and NCRI trialists P 488, ESHRE, Helsinki, 2016, Abstractbook i339*
- 6 Shou H, Chen Y, Chen Z et al. Laparoscopic ovarian transposition in young women with cervical squamous cell carcinoma treated by primary pelvic irradiation. *Eur J Gynaecol Oncol* 2015; 36: 25–29
- 7 Bénard J, Duros S, Hachem HE et al. Freezing oocytes or embryos after controlled ovarian hyperstimulation in cancer patients: the state of the art. *Future Onco* 2016; DOI: 10.2217/fo-2016-0095
- 8 Findeklee S, Lotz L, Heusinger K et al. Fertility protection in female oncology patients: how should patients be counseled? *Geburthsh Frauenheilk* 2015; 75: 1243–1249
- 9 Donnez J, Silber S, Andersen CY et al. Children born after autotransplantation of cryopreserved ovarian tissue: a review of 13 live births. *Ann Med* 2011; 43: 437–450
- 10 Dittrich R, Hackl J, Lotz L et al. Pregnancies and live births after 20 transplantations of cryopreserved ovarian tissue in a single center. *Fertil Steril* 2015; 103: 462–468
- 11 Donnez J, Dolmans MM, Pellicer A et al. Restoration of ovarian activity and pregnancy after transplantation of cryopreserved ovarian tissue: a review of 60 cases of reimplantation. *Fertil Steril* 2013; 99: 1503–1513
- 12 Huober-Zeeb C, Lawrenz B, Popovici RM et al. Improving fertility preservation in cancer: ovarian tissue cryobanking followed by ovarian stimulation can be efficiently combined. *Fertil Steril* 2011; 95: 342–344

- 13 Sanchez-Serrano M, Crespo J, Mirabet V et al. Twins born after transplantation of ovarian cortical tissue and oocyte vitrification. *Fertil Steril* 2010; 93: 268.e11–268.e13
- 14 Sanchez M, Novella-Maestre E, Teruel J et al. The Valencia Programme for Fertility Preservation. *Clin Transl Oncol* 2008; 10: 433–438
- 15 Rosendahl M, Andersen CY, Ernst E et al. Ovarian function after removal of an entire ovary for cryopreservation of pieces of cortex prior to gonadotoxic treatment: a follow-up study. *Hum Reprod* 2008; 23: 2475–2483
- 16 Schmidt KL, Andersen CY, Loft A et al. Follow-up of ovarian function post-chemotherapy following ovarian cryopreservation and transplantation. *Hum Reprod* 2005; 20: 3539–3546
- 17 Donnez J, Dolmans MM, Demylle D et al. Livebirth after orthotopic transplantation of cryopreserved ovarian tissue. *Lancet* 2004; 364: 1405–1410
- 18 Demeestere I, Simon P, Emiliani S et al. Fertility preservation: successful transplantation of cryopreserved ovarian tissue in a young patient previously treated for Hodgkin's disease. *Oncologist* 2007; 12: 1437–1442
- 19 Revel A, Laufer N, Ben Meir A et al. Micro-organ ovarian transplantation enables pregnancy: a case report. *Hum Reprod* 2011; 26: 1097–1103
- 20 Revelli A, Marchino G, Dolfin E et al. Live birth after orthotopic grafting of autologous cryopreserved ovarian tissue and spontaneous conception in Italy. *Fertil Steril* 2013; 99: 227–230
- 21 Lawrenz B, Jauckus J, Kupka MS et al. Fertility preservation in > 1,000 patients: patient's characteristics, spectrum, efficacy and risks of applied preservation techniques. *Arch Gynecol Obstet* 2011; 283: 651–656
- 22 Rosendahl M, Schmidt KT, Ernst E et al. Cryopreservation of ovarian tissue for a decade in Denmark: a view of the technique. *Reprod Biomed Online* 2011; 22: 162–171
- 23 Silber S, Kagawa N, Kuwayama M et al. Duration of fertility after fresh and frozen ovary transplantation. *Fertil Steril* 2010; 94: 2191–2196
- 24 Dolmans MM, Jadoul P, Gilliaux S et al. A review of 15 years of ovarian tissue bank activities. *J Assist Reprod Genet* 2013; 30: 305–314
- 25 Meirrow D, Levron J, Eldar-Geva T et al. Pregnancy after transplantation of cryopreserved ovarian tissue in a patient with ovarian failure after chemotherapy. *N Engl J Med* 2005; 353: 318–321
- 26 Imbert R, Moffa F, Tsepelidis S et al. Safety and usefulness of cryopreservation of ovarian tissue to preserve fertility: a 12-year retrospective analysis. *Hum Reprod* 2014; 29: 1931–1940
- 27 Krishnakumar S, Tambe P. Entry complications in laparoscopic surgery. *J Gynecol Endosc Surg* 2009; 1: 4–11
- 28 Khan Z, Gada RP, Tabbaa ZM et al. Unilateral oophorectomy results in compensatory follicular recruitment in the remaining ovary at time of ovarian stimulation for in vitro fertilization. *Fertil Steril* 2014; 101: 722–727
